# Supplementary material for: Perspectives on Awareness of Unintended Pregnancy Among Young South African Women, Healthcare Providers and Policy Makers
Source: Research Square preprint supplement (doi:10.21203/rs.3.rs-281164/v1), 2021-03-10
Supplement: Supplementary file 1 [file e71aeecd06bcf46d539bec5a.docx]

Supplementary Table 1. Consolidated criteria for reporting qualitative studies (COREQ): 32-item checklist 11

| Topic and Item No. | Guide Questions/Description | Reported on Page No. |
| --- | --- | --- |
| **Domain 1: research team and reflexivity** | |  |
| Personal Characteristics |  |  |
| 1. Interviewer/facilitator | Which author/s conducted the interview or focus  group? –  Authors **Deborah Constant and a trained research assistant** | **Methods – pg. 7, line 131** |
| 2. Credentials | What were the researcher’s credentials? E.g. PhD, MD  **Lead Researcher**  **Deborah Constant, PhD MPH**  **Interviewers** | **Title – pg. 1**  **Acknowledgement – pg** |
| 3. Occupation | What was occupation at the time  **Dr Constant: Director, Women’s Health Research Unit** | **Title – pg. 1** |
| 4. Gender | Was the researcher male or female?  **Female** | **Pg. 6, line 107** |
| 5. Experience and training | What experience or training did the researcher have?  **Interviewers were experienced in qualitative interviewing and received specific training to conduct to conduct these interviews, through role play.** | **Methods – pg. 7, line 131** |
| Relationship with participants | |  |
| 6. Relationship established | Was a relationship established prior to study commencement?  **No** |  |
| 7. Participant knowledge of the interviewer | What did the participants know about the researcher? *e.g. personal goals, reasons for doing the*  *research*  **Participants were provided with an information sheet and consent form which outlined the aim of the study** | **Pg. 7, line 131-136** |
| 8. Interviewer characteristics | What characteristics were reported about the interviewer/facilitator? e.g. *Bias, assumptions,*  *reasons and interests in the research topic*  **Participants knew the researchers were scholars.** |  |
| **Domain 2: study design** | |  |
| Theoretical framework |  |  |
| 9. Methodological orientation and Theory | What methodological orientation was stated to underpin the study? *e.g. grounded theory, discourse analysis, ethnography, phenomenology,*  *content analysis*  **Thematic analysis** | **Methods – pg. 8, line 159-160** |
| Participant selection | |  |
| 10. Sampling | How were participants selected? *e.g. purposive,*  *convenience, consecutive, snowball*  **Purposive** | **Methods – pg. 6, line 119-120** |
| 11. Method of approach | How were participants approached? *e.g. face-to-*  *face, telephone, mail, email*  **Face-to-face and by phone** | **Methods – pg. 7, line 135-136** |
| 12. Sample size | How many participants were in the study?  **40 women and 7 providers** | **Methods – pg. 7, line 119-129** |
| 13. Non-participation | How many people refused to participate or  dropped out? Reasons? | **There were no participants who subsequently refused to participate, withdrew consent or dropped**  **out.** |

| Setting | |  |
| --- | --- | --- |
| 14. Setting of data collection | Where was the data collected? *e.g. home, clinic,*  *Workplace*  **Private space in the abortion facility following recovery after the surgical procedure and prior to discharge from the facility** | **Methods – pg. 7, line 132-134** |
| 15. Presence of non-participants | Was anyone else present besides the participants  and researchers?  **No** |  |
| 16. Description of sample | What are the important characteristics of the sample? *e.g. demographic data, date* | **Results – pg. 8, line 167-174** |
| Data collection | |  |
| 17. Interview guide | Were questions, prompts, guides provided by the authors? Was it pilot tested? | **Methods – pg. 8, line 146** |
| 18. Repeat interviews | Were repeat interviews carried out? If yes, how  many?  **No** |  |
| 19. Audio/visual recording | Did the research use audio or visual recording to  collect the data? | **Methods – pg. 8, line 149** |
| 20. Field notes | Were field notes made during and/or after the  interview or focus group?  **No** |  |
| 21. Duration | What was the duration of the interviews or focus  group?  **Ranged between 30-40 minutes** | **Methods – pg. 8, line 149** |
| 22. Data saturation | Was data saturation discussed?  **No** |  |
| 23. Transcripts returned | Were transcripts returned to participants for  comment and/or correction?  **No** |  |
| **Domain 3: analysis and findings** | |  |
| Data analysis | |  |
| 24. Number of data coders | How many data coders coded the data?  **Two** | **Methods – pg. 8, line 162-164** |
| 25. Description of the coding tree | Did authors provide a description of the coding  tree?  **Coding described in methods section** | **Methods – pg. 8, line 159-164** |
| 26. Derivation of themes | Were themes identified in advance or derived  from the data?  **Themes were derived from the data** | **Methods – pg. 8, line 159-164** |
| 27. Software | What software, if applicable, was used to manage the data?  **NViVo** | **Methods – pg. 8, line 161-162** |
| 28. Participant checking | Did participants provide feedback on the findings?  **No** |  |
| Reporting | |  |
| 29. Quotations presented | Were participant quotations presented to illustrate the themes / findings? Was each  quotation identified? *e.g. participant number*  **Yes, specific comments were supported with**  **direct quotes attributed to anonymized participant** | **Results – pg. 8-15** |
| 30. Data and findings consistent | Was there consistency between the data  presented and the findings?  **Yes** |  |
| 31. Clarity of major themes | Were major themes clearly presented in the  findings?  **Yes** | **Results – pg. 8-15** |
| 32. Clarity of minor themes | Is there a description of diverse cases or discussion  of minor themes?  **No** |  |
